# Supplementary material for: A Time-Series Method for Automated Measurement of Changes in Mitotic and Interphase Duration from Time-Lapse Movies
Source: PLOS journal article supplement (doi:10.1371/journal.pone.0025511), 2011-09-26
Supplement: S5 (10.1371/journal.pone.0025511.s005) [file journal.pone.0025511.s005]

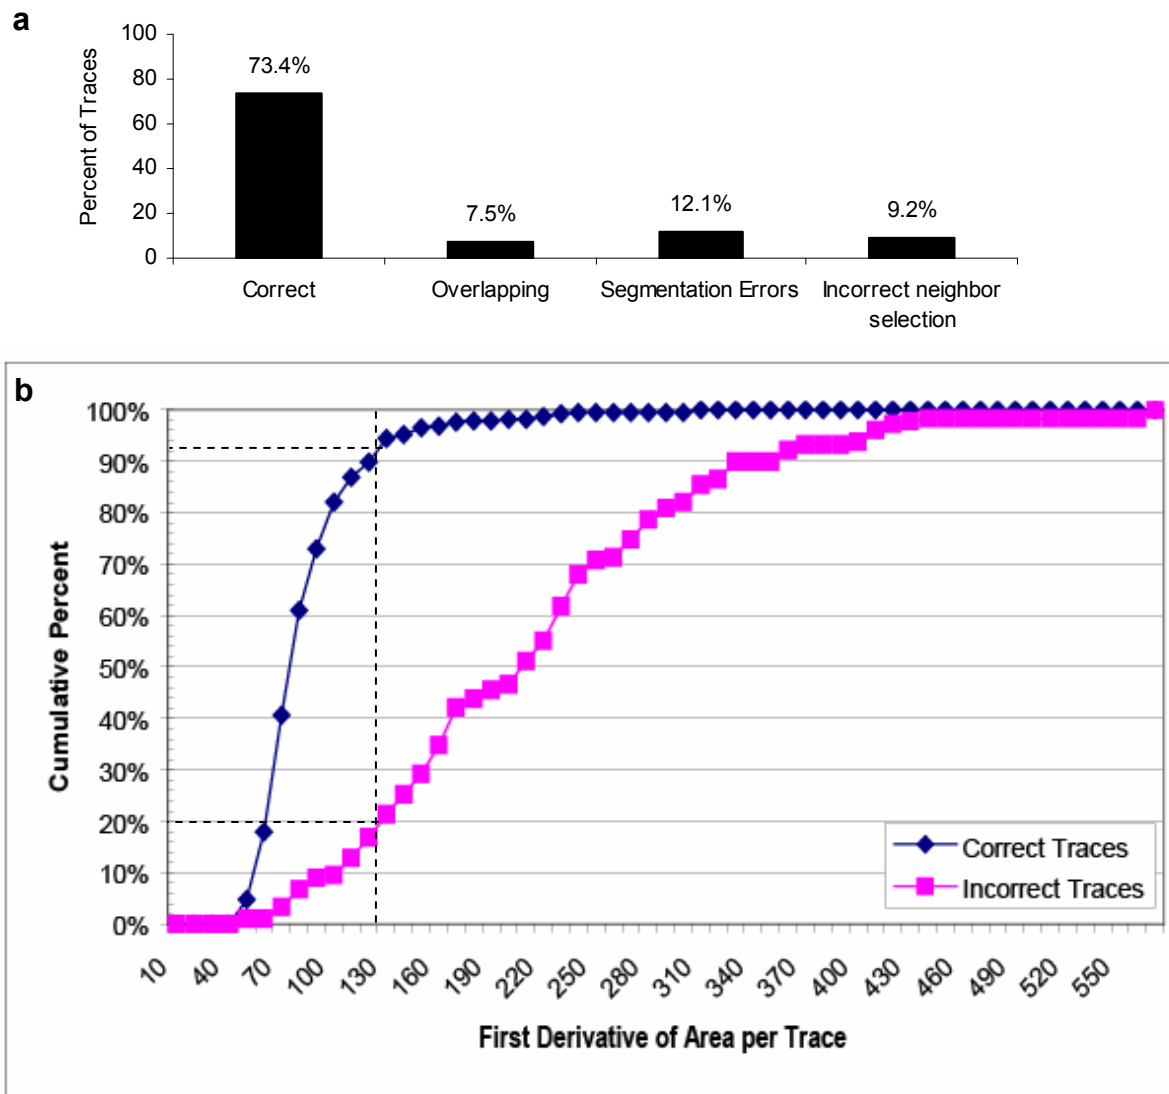

Figure S5.
